# Supplementary material for: Genome-wide identification of growth-regulating factor transcription factor family related to leaf and stem development in alfalfa
Source: Front Plant Sci. 2022 Aug 23;13:964604. doi: 10.3389/fpls.2022.964604 (PMC9445573; doi:10.3389/fpls.2022.964604)
Supplement: Supplementary file 3 [file Data_Sheet_1.xlsx]

## Sheet: Table S1
Table S1. Characterization of ten conserved motifs in MsGRF sequences
Motif	Width	E-value	Motif consensus
1	46	4.5e-1175	IDPEPGRCRRTDGKKWRCSRDAVPDSKYCERHMHRGRNRSRKPVEL
2	41	9.9e-743	PFTPSQWQELEHQALIYKYMLAGLSVPPDLLLPIKKSLLDS
3	29	5.5e-158	DDKSSTTQLSISIPMSSSDFSSFTSTNTH
4	29	2.7e-182	RNRYRYGLKSEVEEHSFFQEPSGTDRRSS
5	21	9.3e-158	QSLRSFFDDWPKSSSSASVAE
6	29	1.2e-140	KQSRNQDNESYKQHSTYNSSLLNNAFQHH
7	50	3.4e-165	TSEDDSTNSTPLVSSPSGVLKKKAFASLSBSSENSSPRVENNKANPEIAL
8	50	1.2e-162	NHNNKJGQTNGSSYANTTERQYLNNKPLYNSSELAQDEPPLPLLPPPLEL
9	29	8.2e-122	VESSMGGPLAEVLRLSNTTSSSANTBHNT
10	41	4.2e-130	TTTQSSSSVSVITLSGSSKQLGAGGSSPSTSIVTAEVNAT

## Sheet: Table S2
Table S2. Duplication events of MsGRFs
Segment pairs	Ka/Ks	Replication time
MsGRF1&MsGRF2	0.304199	222719
MsGRF1&MsGRF3	0.607559	375101
MsGRF1&MsGRF4	0.30343	335076
MsGRF2&MsGRF3	0.682551	300191
MsGRF2&MsGRF4	0.129745	260710
MsGRF3&MsGRF4	0.577654	414010
MsGRF5&MsGRF6	0.182534	1.54627e+06
MsGRF5&MsGRF24	0.238921	2.72655e+07
MsGRF5&MsGRF25	0.238921	2.72655e+07
MsGRF5&MsGRF26	0.238921	2.72655e+07
MsGRF5&MsGRF27	0.238921	2.72655e+07
MsGRF6&MsGRF24	0.242065	2.7302e+07
MsGRF6&MsGRF25	0.242065	2.7302e+07
MsGRF6&MsGRF26	0.242065	2.7302e+07
MsGRF6&MsGRF27	0.242065	2.7302e+07
MsGRF7&MsGRF8	0.201076	775256
MsGRF7&MsGRF9	0.240827	871548
MsGRF7&MsGRF10	0.303355	513937
MsGRF8&MsGRF9	0.218175	961657
MsGRF8&MsGRF10	0.364044	428093
MsGRF9&MsGRF10	0.301753	695395
MsGRF11&MsGRF12	0.0966325	1.40224e+06
MsGRF11&MsGRF13	0.0725294	1243941
MsGRF12&MsGRF13	0.0415388	1.08502e+06
MsGRF14&MsGRF15	0.235653	1.49801e+06
MsGRF14&MsGRF16	0.213575	1.65287e+06
MsGRF14&MsGRF17	0.186181	1.66162e+06
MsGRF15&MsGRF16	0	436375
MsGRF15&MsGRF17	0.299599	438608
MsGRF16&MsGRF17	0.224038	586537
MsGRF18&MsGRF19	0.151378	272947

## Sheet: Table S3
Table S3. Expression of MsGRFs genes in different different developmental stages of leaves and stems
	Leaf				Stem
Gene Name	L-1	L-2	L-3	L-4	S-1	S-2	S-3	S-4	S-5	S-6	S-7	S-8
MsGRF1	0.572588	0.111157	0.124216	0.184199	3.38829	1.48898	0.230271	0.113234	0.434216	0.375991	0.282564	0.247476
MsGRF2	0.373867	0.0483868	0.0513447	0.0749179	1.5858	0.64945	0.0685228	0.0320442	0.127507	0.151062	0.107094	0.0644181
MsGRF3	0.600609	0.115855	0.128523	0.190572	2.95126	1.40036	0.21776	0.126857	0.418566	0.406069	0.334298	0.248884
MsGRF4	0.594051	0.112059	0.114856	0.194074	3.0873	1.34505	0.212891	0.138721	0.385146	0.414445	0.276108	0.227828
MsGRF5	0.354372	0.110198	0.110575	0.112909	0.231155	0.0411933	0.00552778	0.00575896	0.0132654	0.00127028	0.00140863	0
MsGRF6	0.40633	0.142317	0.125635	0.131539	0.153696	0.0294058	0.00692281	0	0	0.00468731	0.00225305	0.00118397
MsGRF7	0.0206293	0.00375289	0.00656801	0.0111681	0.134216	0.088896	0.0212086	0.0104634	0.0357233	0.0467117	0.0377544	0.0349098
MsGRF8	0.0201691	0.0033943	0.00704983	0.0114465	0.111121	0.087038	0.0313845	0.0100658	0.0693497	0.0583397	0.0376673	0.0291291
MsGRF9	0.00986095	0.000647487	0.0010944	0.00134106	0.0165324	0.0174076	0.0042675	0.0118675	0.0153989	0.0149019	0.00589774	0.0101422
MsGRF10	0.0204517	0.00456526	0.00729542	0.00987623	0.111439	0.0837942	0.0194627	0.00308541	0.0450806	0.060327	0.038824	0.0352421
MsGRF11	0.0545546	0.0332587	0.0568941	0.0578192	0.463215	0.17766	0.020681	0.0236893	0.0340467	0.0323102	0.0175683	0.0217198
MsGRF12	0.0514027	0.0309256	0.0567787	0.0557778	0.35268	0.154021	0.0183686	0.0136897	0.0321311	0.018482	0.0317134	0.0209418
MsGRF13	0.0292199	0.0189109	0.0324842	0.0377615	0.19359	0.0547935	0.00644323	0.00648354	0.0234855	0.00961	0.00845567	0.00599671
MsGRF14	0.0373762	0.0519362	0.0802304	0.0920545	0.0129079	0.0114969	0.0136304	0.014355	0.0410968	0.0232313	0.0200413	0.0136141
MsGRF15	0.0358745	0.0486265	0.0755926	0.0870602	0.0277834	0.0153226	0.0109636	0.0101894	0.032492	0.022988	0.0127951	0.0175576
MsGRF16	0.0355132	0.051608	0.0770106	0.0943095	0.0164753	0.013125	0.0141888	0.021872	0.037068	0.0112184	0.0160807	0.00786284
MsGRF17	0.038238	0.0476256	0.0810565	0.0979649	0.0255226	0.0161035	0.00660068	0.0110244	0.0189963	0.0143963	0.0219865	0.0108791
MsGRF18	0.373867	0.133823	0.0494266	0.0255786	0.0744194	0.0112052	0.00593445	0.0136511	0	0	0.00399755	0
MsGRF19	0.394411	0.133045	0.0457377	0.0284052	0.0378641	0.0227384	0.0137836	0	0	0.000660312	0	0
MsGRF20	0.194937	0.0668123	0.0232362	0.0136718	0.0863794	0.0326748	0.00273674	0.00554428	0.0112485	0.00286617	0.00232618	0.000748702
MsGRF21	0.253022	0.139573	0.0522386	0.025569	0.056394	0.0226625	0.00291094	0	0	0	0	0.0017693
MsGRF22	0.247187	0.0915873	0.029781	0.015899	0.142566	0.125371	0.0294023	0.0201886	0.0174234	0.00624961	0.0100866	0.00929758
MsGRF23	0.2199	0.0807235	0.0308139	0.0120143	0.16153	0.100398	0.0307221	0.0102535	0.0223844	0.00786417	0.0155006	0.00675296
MsGRF24	0.0257916	0.00479523	0.00422426	0.00760834	0.190865	0.0979185	0.022448	0.00297685	0.0261997	0.0158708	0.00799531	0.00816029
MsGRF25	0.0298279	0.0117827	0.00446278	0.00798806	0.264258	0.104198	0.0103671	0.0149441	0.0637414	0.00633957	0.0103024	0.0092079
MsGRF26	0.0235025	0.00473217	0.00250675	0.0068333	0.0743368	0.0242484	0.00159905	0.0041177	0	0.00583024	0	0.00262626
MsGRF27	0.0175689	0.00436859	0.00462973	0	0.281588	0.132137	0.0291225	0.00534095	0.0209797	0.0148769	0.018247	0.00673363

## Sheet: Table S4
Table S4. Sequences of primers used in qRT-PCR
Gene Name	Forward primer sequence (5′ → 3′)	Reverse primer sequence (5′ → 3′)
MsGRF1	CAACACCGATGACTTCCT	GAGAGCACTACTTCCAACA
MsGRF2	GCTGCTTCTTACCATCCTA	TGTTCCAACTCCATCCATT
MsGRF3	CAACACCGATGACTTCCT	GAGAGCACTACTTCCAACA
MsGRF4	CAACACCGATGACTTCCT	GCACTACTTCCAACACCTA
MsGRF5	GAAGAGGTTGATGAGTATGC	ATTGTGAGTGGTGTTAGTTG
MsGRF6	AGAAGAGGTGGATGAGTATG	AGTAGAAGATGATGAGGAAGAA
MsGRF7	TGCGAGTGATGATGATAGT	GTTGTGAGAGTTGATGATGAA
MsGRF8	TGCGAGTGATGATGATAGT	TGTTGTGAGAGGTGATGAT
MsGRF9	TCTTCACCTCTCACAACAA	GGACTGCTATTACCACTACT
MsGRF10	TGCTGCGAGTGATGATGATAGTA	TTGTTGTTGTGAGAGGTGATGATG
MsGRF11	CTTGTCCTTCCTATTCATTCC	AGTCCTCCTACATCTTCCT
MsGRF12	TCCTTCCTATTCATTCCAGTT	CCATCAGTCCTCCTACATC
MsGRF13	ATCTTGTCCTTCCTATTCACT	TCCATCAGTCCTTCTACATC
MsGRF14	TTCTGCTTCTGTTACTGCTA	TTGTTCTCCTCTGCTTCC
MsGRF15	TTCTGCTTCTGTTACTGCTA	TTGTTCTCCTCTGCTTCC
MsGRF16	TTCTGCTTCTGTTACTGCTA	TTGTTCTCCTCTGCTTCC
MsGRF17	TTCTGCTTCTGTTACTGCTA	TTGTTCTCCTCTGCTTCC
MsGRF18	TCAACACCACCAACAATCAC	CAGAAGCACCAACCAACAT
MsGRF19	TCAACACCACCAACAATCAC	CAGAAGCACCAACCAACAT
MsGRF20	ATCAACACCACCAACAATC	CTAATGCTGAATCTGACAAGT
MsGRF21	AACACCACCAACAATCACC	CAGAAGCACCAACCAACAT
MsGRF22	GTCTTCTTCATTCATCTCCTTAT	ATCCATTGCTCCTCTTCC
MsGRF23	ATGTTGGTTGGTGCTTCT	CAATGCTGTAGGTTGATAATGAT
MsGRF24	AAGAGGAGGTGGATGAAC	TTATGGTAAGTGGTGTGAGT
MsGRF25	AAGAGGAGGTGGATGAAC	TTATGGTAAGTGGTGTGAGT
MsGRF26	CACTCTTCTTATGCTTCTTCC	ATGTTCATCCACCTCCTC
MsGRF27	AAGAGGAGGTGGATGAAC	TTATGGTAAGTGGTGTGAGT

## Sheet: Table S5
Table S5 The GRF genes used in the study.
Medicago sativa		Glycine max		Arabidopsis thaliana
MsGRF1	MS.gene24503.t1	GmGRF1	Glyma.01G148600	AtGRF1	AT2G22840.1
MsGRF2	MS.gene00530.t1	GmGRF2	Glyma.01G234400	AtGRF2	AT4G37740.1
MsGRF3	MS.gene051667.t1	GmGRF3	Glyma.03G192200	AtGRF3	AT2G36400.1
MsGRF4	MS.gene66485.t1	GmGRF4	Glyma.04G230600	AtGRF4	AT3G52910.1
MsGRF5	MS.gene025207.t1	GmGRF5	Glyma.06G134600	AtGRF5	AT3G13960.1
MsGRF6	MS.gene64421.t1	GmGRF6	Glyma.07G038400	AtGRF6	AT2G06200.1
MsGRF7	MS.gene06847.t1	GmGRF7	Glyma.09G068700	AtGRF7	AT5G53660.1
MsGRF8	MS.gene057219.t1	GmGRF8	Glyma.09G212500	AtGRF8	AT4G24150.1
MsGRF9	MS.gene06630.t1	GmGRF9	Glyma.10G067200	AtGRF9	AT2G45480.1
MsGRF10	MS.gene013521.t1	GmGRF10	Glyma.11G008500
MsGRF11	MS.gene53920.t1	GmGRF11	Glyma.11G110700
MsGRF12	MS.gene025012.t1	GmGRF12	Glyma.11G208800
MsGRF13	MS.gene63415.t1	GmGRF13	Glyma.12G014700
MsGRF14	MS.gene72850.t1	GmGRF14	Glyma.13G109500
MsGRF15	MS.gene001120.t1	GmGRF15	Glyma.15G176500
MsGRF16	MS.gene028055.t1	GmGRF16	Glyma.16G007600
MsGRF17	MS.gene070101.t1	GmGRF17	Glyma.17G050200
MsGRF18	MS.gene020536.t1	GmGRF18	Glyma.17G232600
MsGRF19	MS.gene007262.t1	GmGRF19	Glyma.17G232700
MsGRF20	MS.gene24648.t1	GmGRF20	Glyma.19G192700
MsGRF21	MS.gene007264.t1	GmGRF21	Glyma.U028600
MsGRF22	MS.gene007261.t1	GmGRF22	Glyma.U028700
MsGRF23	MS.gene051361.t1
MsGRF24	MS.gene26508.t1
MsGRF25	MS.gene051816.t1
MsGRF26	MS.gene012219.t1
MsGRF27	MS.gene24830.t1
